# Supplementary material for: Ellagitannins and Oligomeric Proanthocyanidins of Three Polygonaceous Plants
Source: PubMed Central journal article supplement (PMC7828057; doi:10.3390/molecules26020337), 2021-01-11

# Supplementary Materials

## Hydrolyzable Tannins and Oligomeric proanthocyanidins of Three Polygonaceous Plants

Yun-Qiu Li <sup>1,2</sup>, Masako Kitaoka <sup>1</sup>, Juri Takayoshi <sup>1</sup>, Ya-Feng Wang <sup>3</sup>, Yong-Lin Huang <sup>3,\*</sup>, Yosuke Matsuo <sup>1</sup>, Yoshinori Saito <sup>1</sup>, Dian-Peng Li <sup>3</sup>, Gen-ichiro Nonaka <sup>4</sup>, Zhi-Hong Jiang <sup>5</sup> and Takashi Tanaka <sup>1,\*</sup>

<sup>1</sup> Department of Natural Product Chemistry, Graduate School of Biomedical Sciences, Nagasaki University, 1-14 Bunkyo-machi, Nagasaki 852-8521, Japan

<sup>2</sup> College of Medical Laboratory Science, Guilin Medical University, 109, Huancheng north 2 Road, Guilin, Guangxi, 541004, China

<sup>3</sup> Guangxi Key Laboratory of Functional Phytochemicals Research and Utilization, Guangxi Institute of Botany, Guilin 541006, China

<sup>4</sup> Usaien Pharmaceutical Company, Ltd., 1-4-6 Zaimoku, Saga 840-0055, Japan

<sup>5</sup> Institute for Applied Research in Medicine and Health, Macau University of Science and Technology, Taipa, Macau 999078, China

\* Correspondence: t-tanaka@nagasaki-u.ac.jp; Tel.: +81-95-819-2432 (T.T.)

Figure S1. HPLC of extracts of Polygonaceous plants.

Figure S2. HPLC analysis of acid hydrolysis products of **3**.

Figure S3. Thiol degradation of proanthocyanidin oligomers.

Figure S4. <sup>1</sup>H NMR spectrum of **3**.

Figure S5. <sup>13</sup>C NMR spectrum of **3**.

Figure S6. <sup>1</sup>H-<sup>1</sup>H COSY spectrum of **3**.

Figure S7. HSQC spectrum of **3**.

Figure S8. HMBC spectrum of **3**.

Figure S9. <sup>1</sup>H NMR spectrum of **11**.

Figure S10. <sup>13</sup>C NMR spectrum of **11**.

Figure S11. <sup>1</sup>H-<sup>1</sup>H COSY spectrum of **11**.

Figure S12. HSQC spectrum of **11**.

Figure S13. HMBC spectrum of **11**.

Figure S14. NOESY spectrum of **11**.

Figure S15. <sup>1</sup>H NMR spectrum of **7**.

Figure S16. <sup>13</sup>C NMR spectrum of **7**.

Figure S17. <sup>1</sup>H NMR spectrum of **7a**.

Figure S18. <sup>13</sup>C NMR spectrum of **7a**.

Figure S1. HPLC of 60% CH<sub>3</sub>CN extracts of Polygonaceous plants.

*Reynoutria japonica*

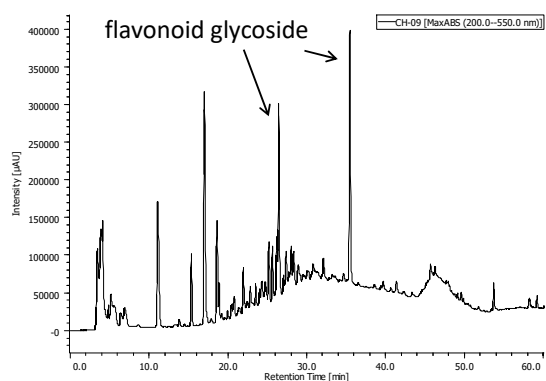

*Persicaria perfoliata*

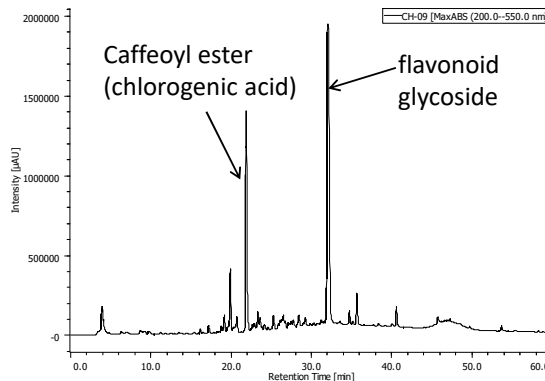

*Persicaria longisetata*

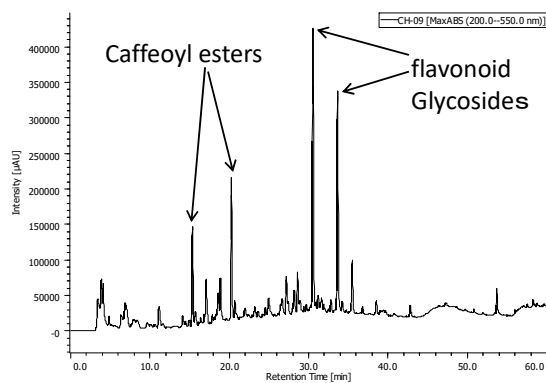

*Persicaria lapathifolia*

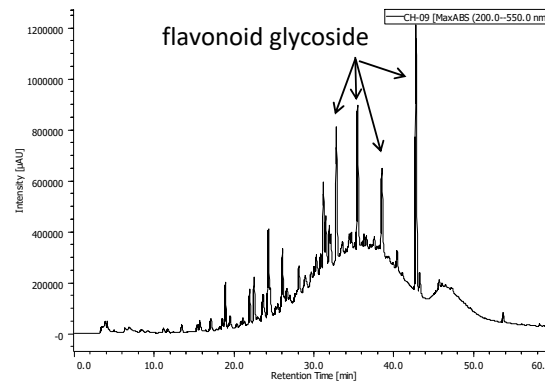

*Persicaria filiformis*

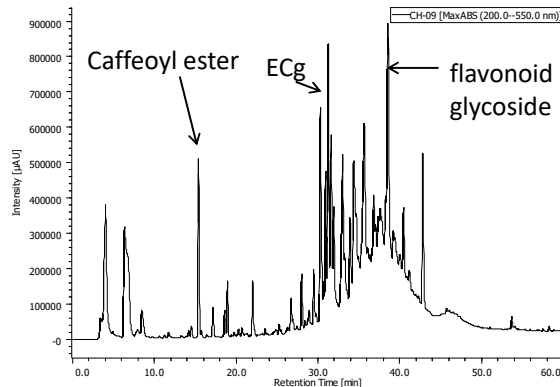

*Persicaria thunbergii*

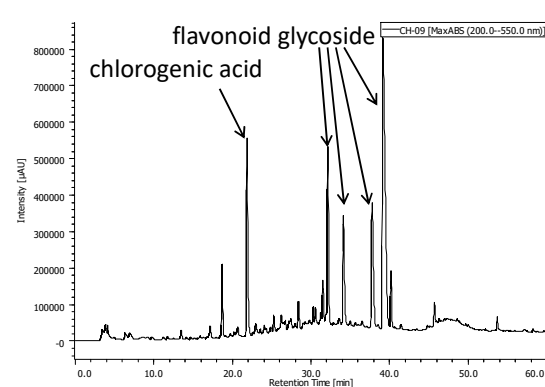

Figure S2. HPLC analysis of acid hydrolysis products of 3.

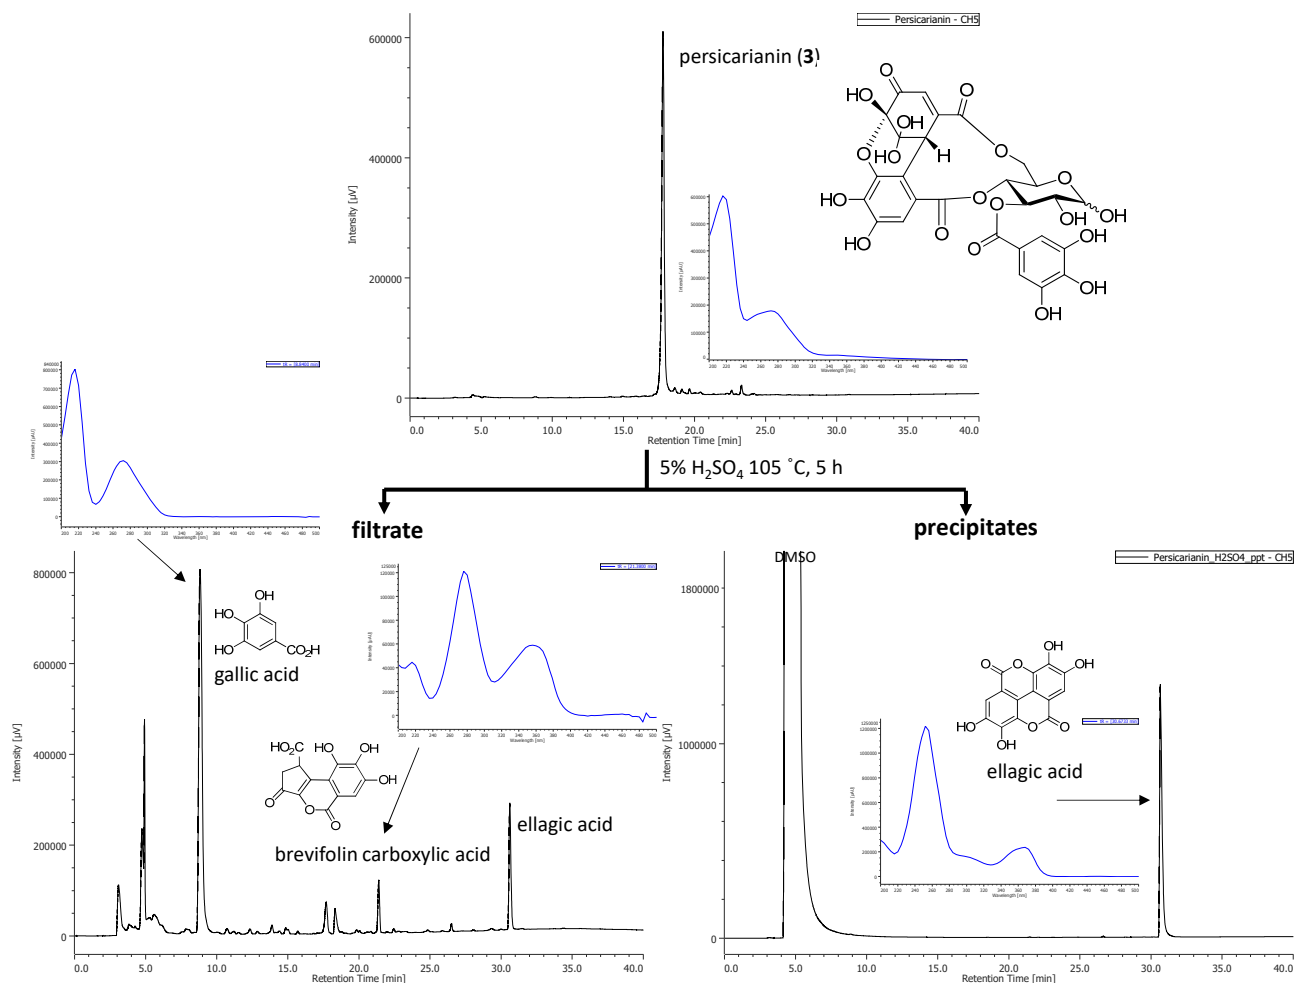

Figure S3. Thiol degradation of proanthocyanidin oligomers.

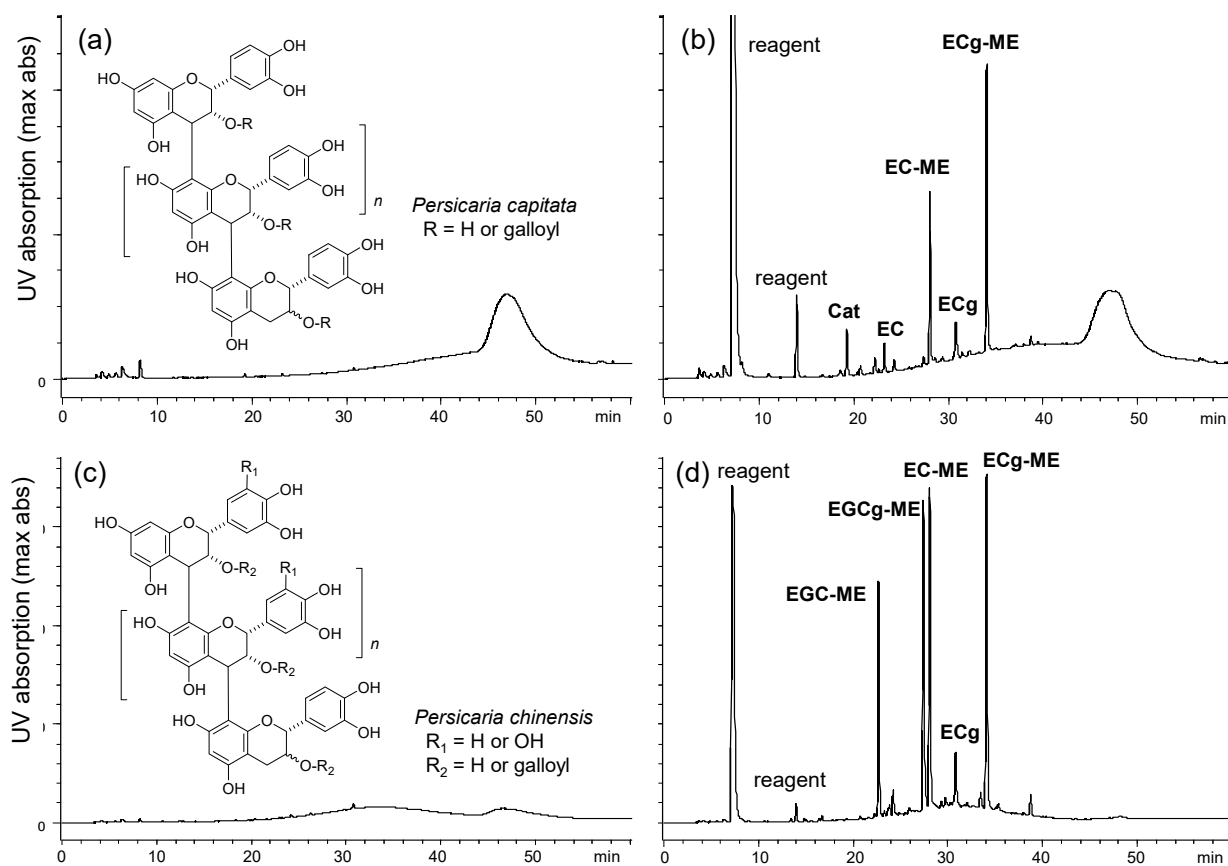

(a) Proanthocyanidin oligomers of *Persicaria capitata*, (b) Thiol degradation products of Proanthocyanidin oligomers of *Persicaria capitata*, (c) Proanthocyanidin oligomers of *Persicaria chinensis*, (d) Thiol degradation products of Proanthocyanidin oligomers of *Persicaria chinensis*.

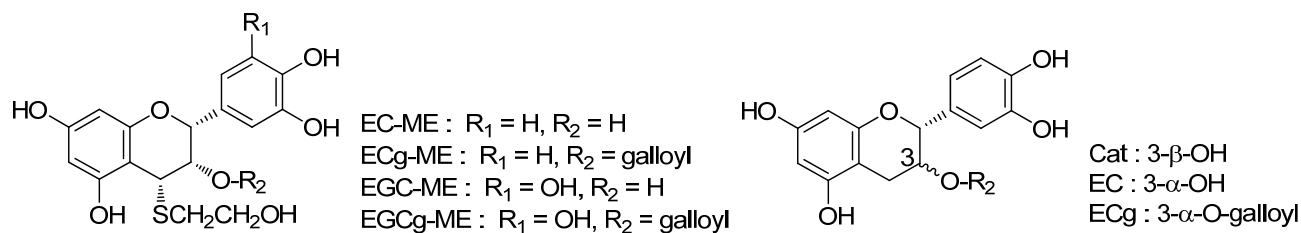

Figure S4.  $^1\text{H}$  NMR spectrum of **3**.

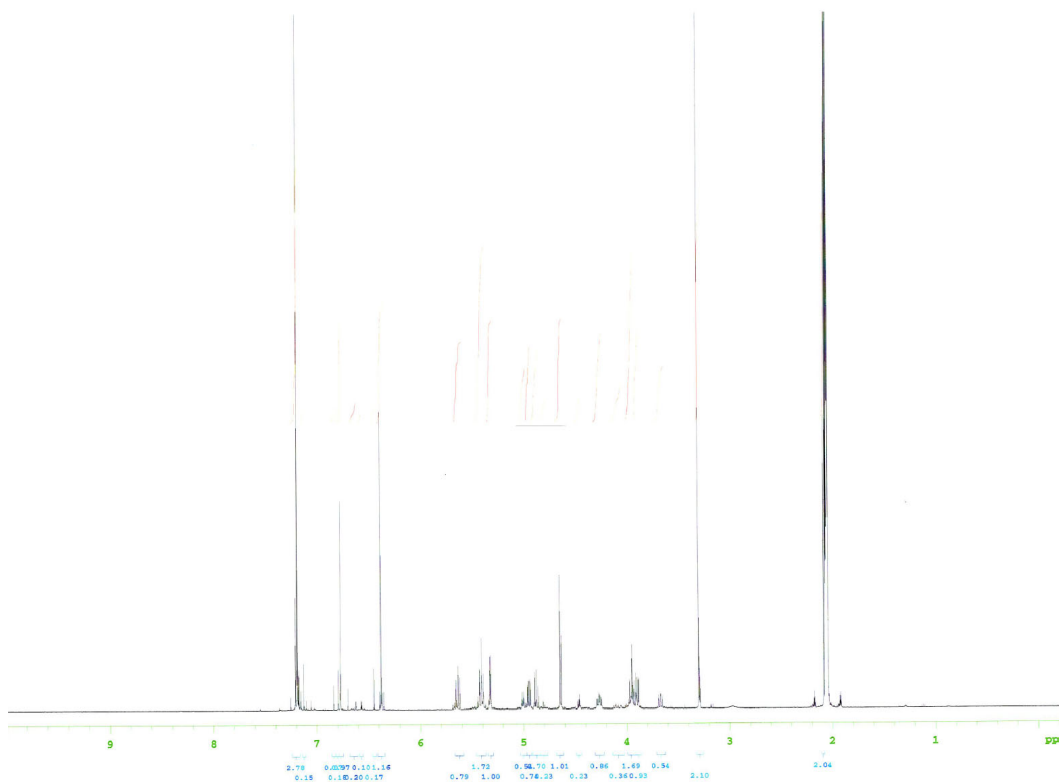

Figure S5.  $^{13}\text{C}$  NMR spectrum of **3**.

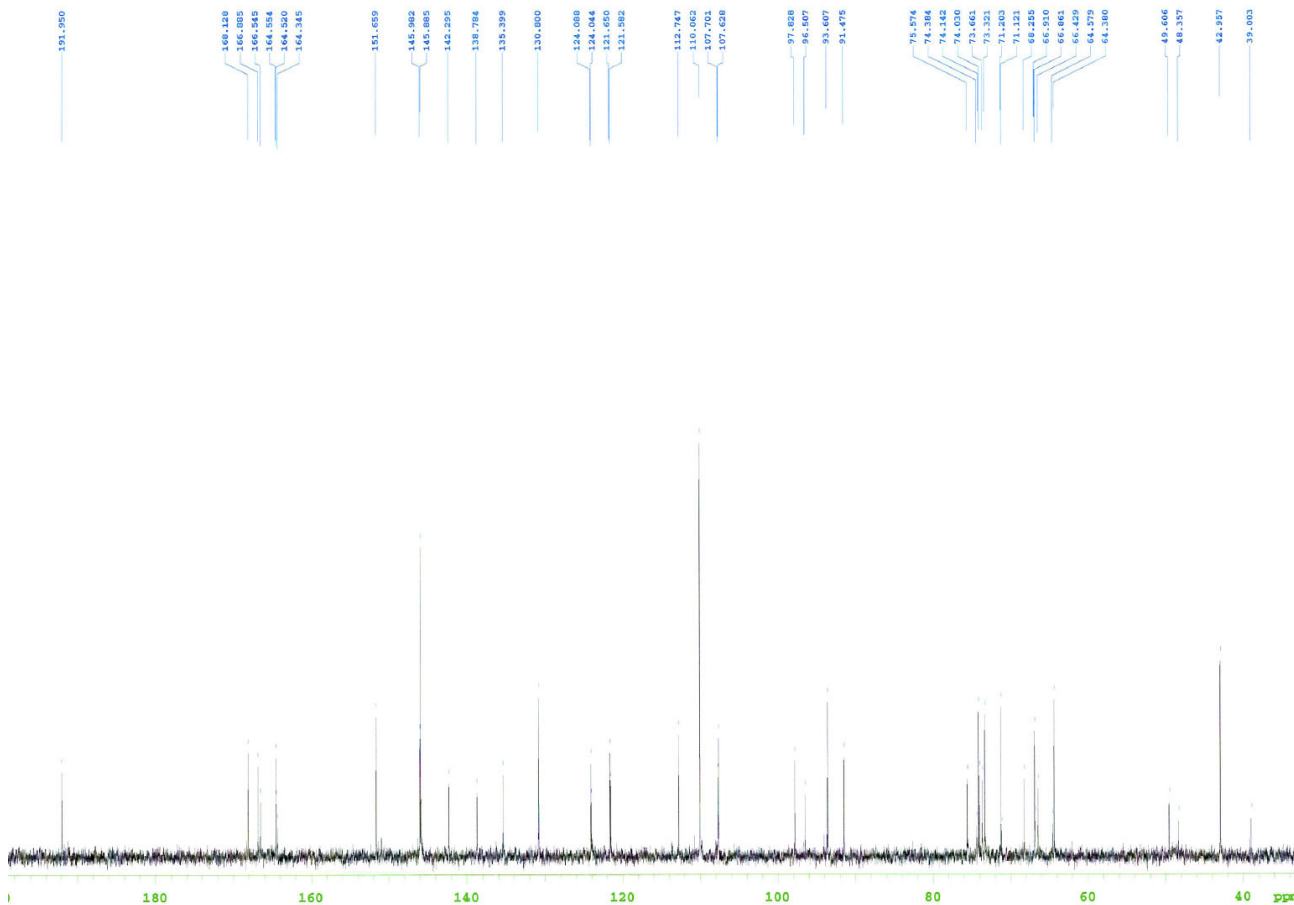

Figure S6.  $^1\text{H}$ - $^1\text{H}$  COSY spectrum of 3.

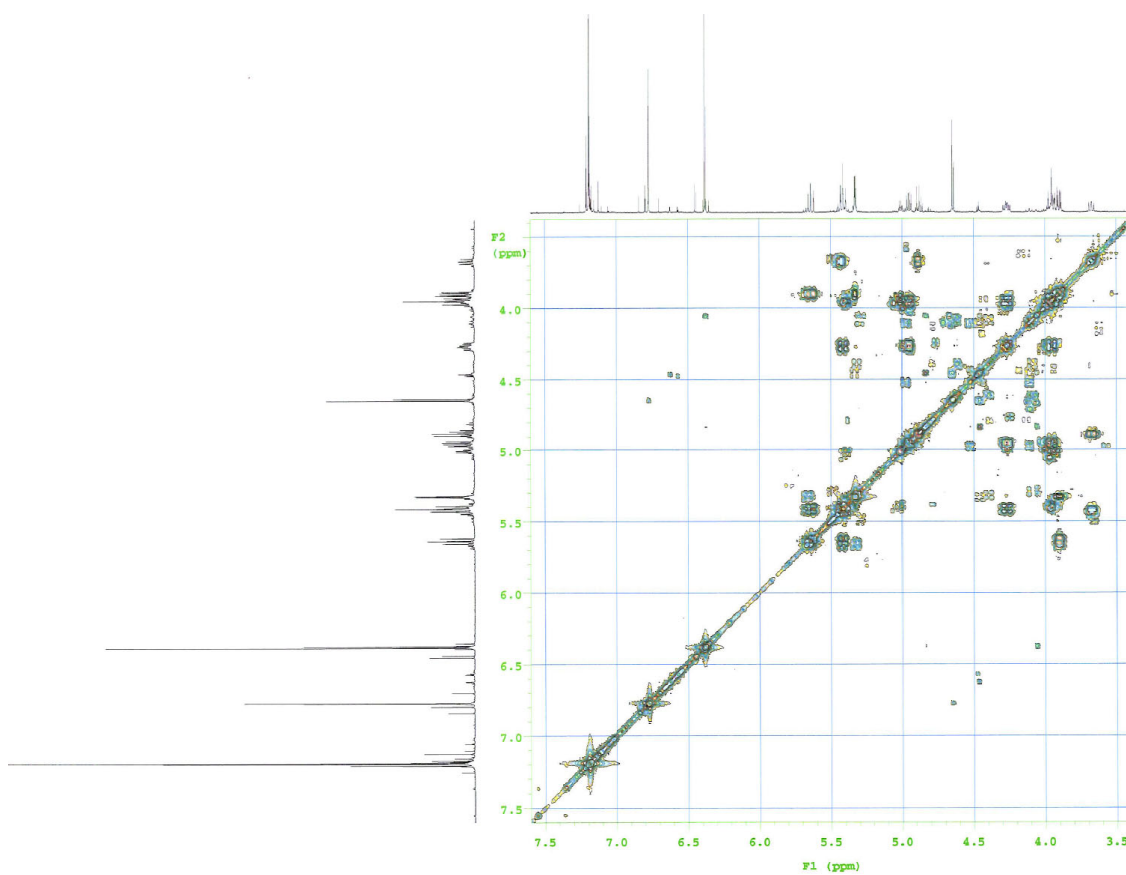

Figure S7. HSQC spectrum of 3.

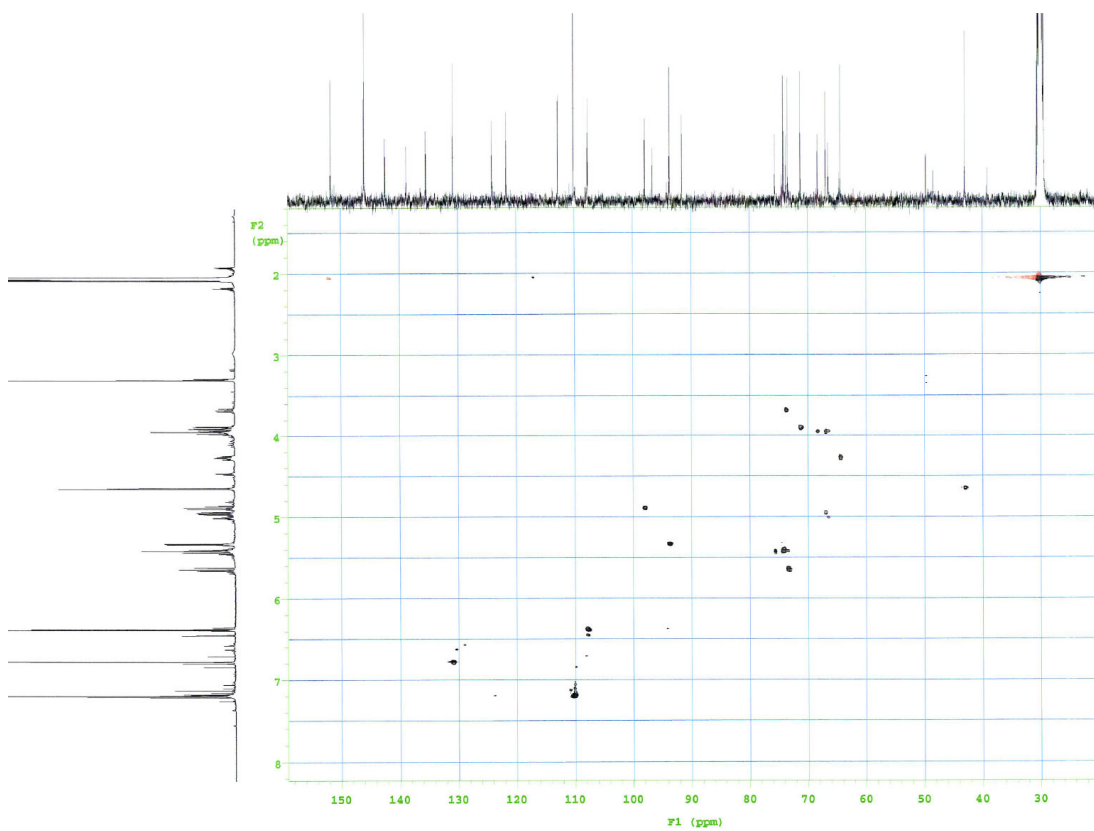

Figure S8. HMBC spectrum of 3.

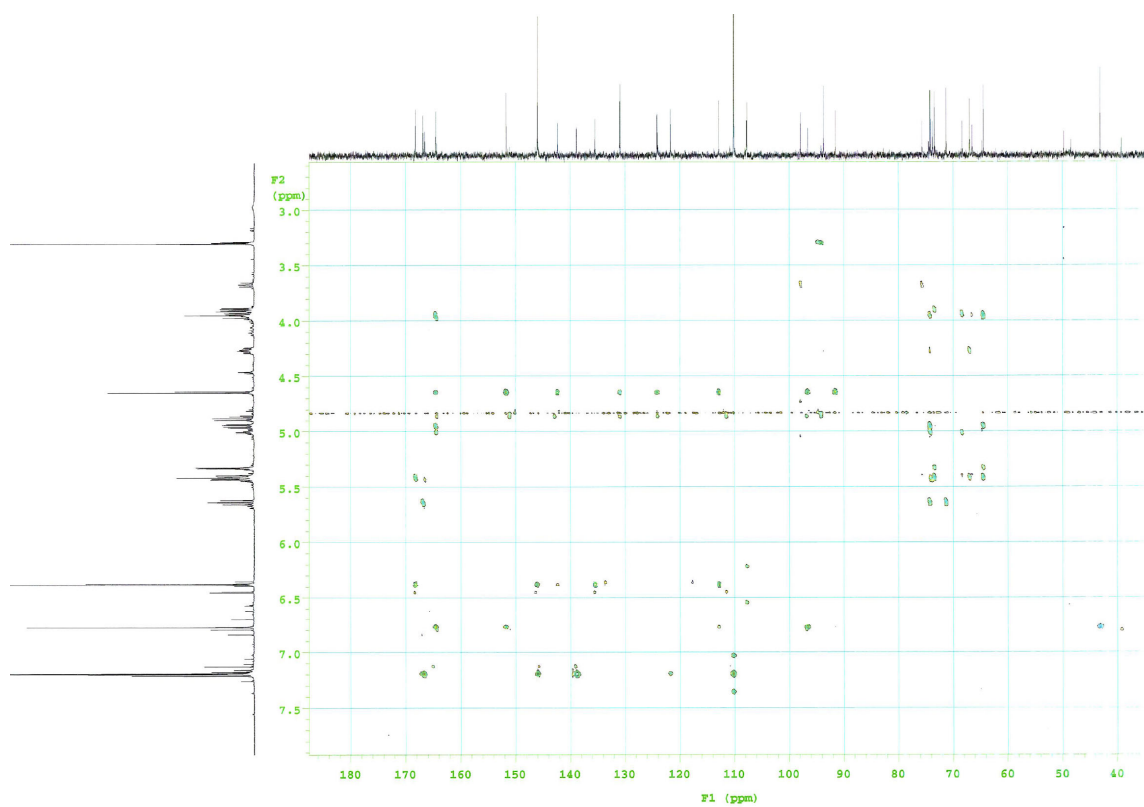

Figure S9.  $^1\text{H}$  NMR spectrum of 11.

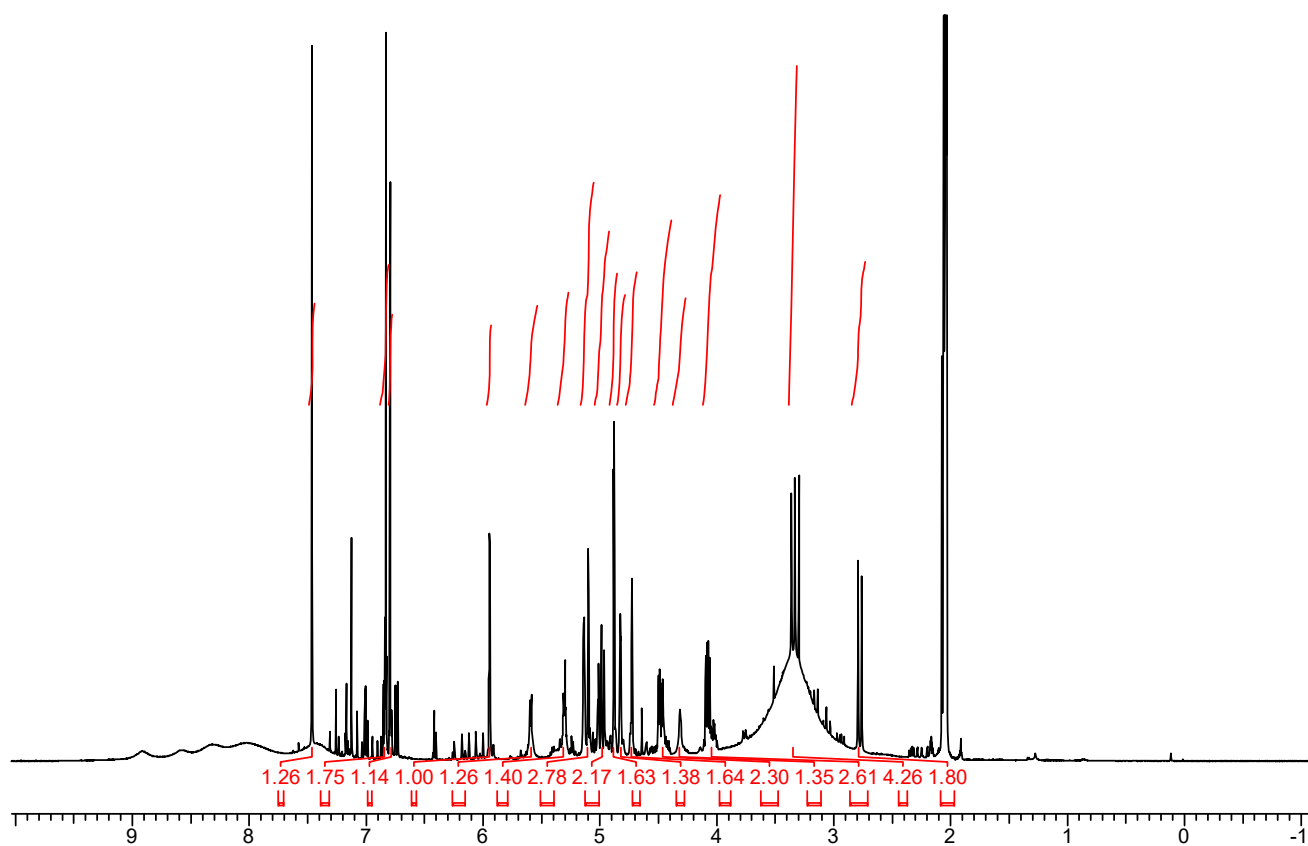

Figure S10.  $^{13}\text{C}$  NMR spectrum of **11**.

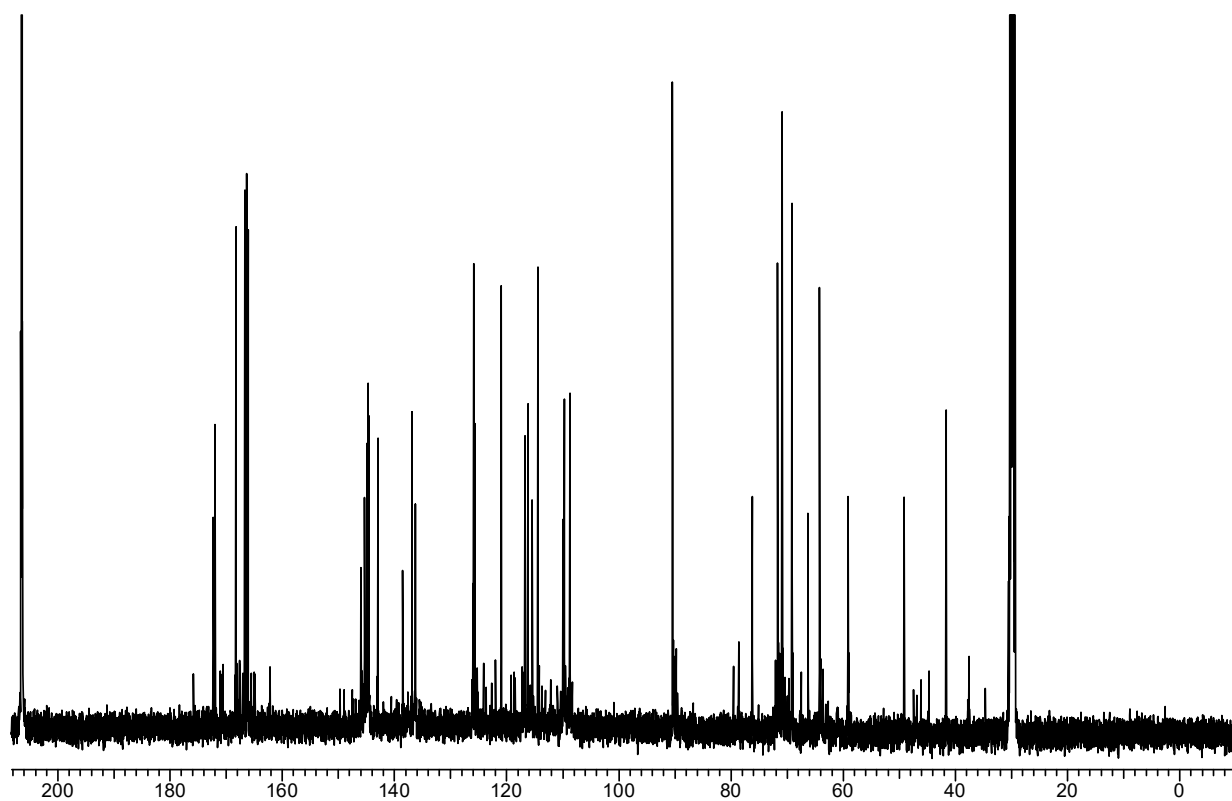

Figure S11.  $^1\text{H}$ - $^1\text{H}$  COSY spectrum of **11**.

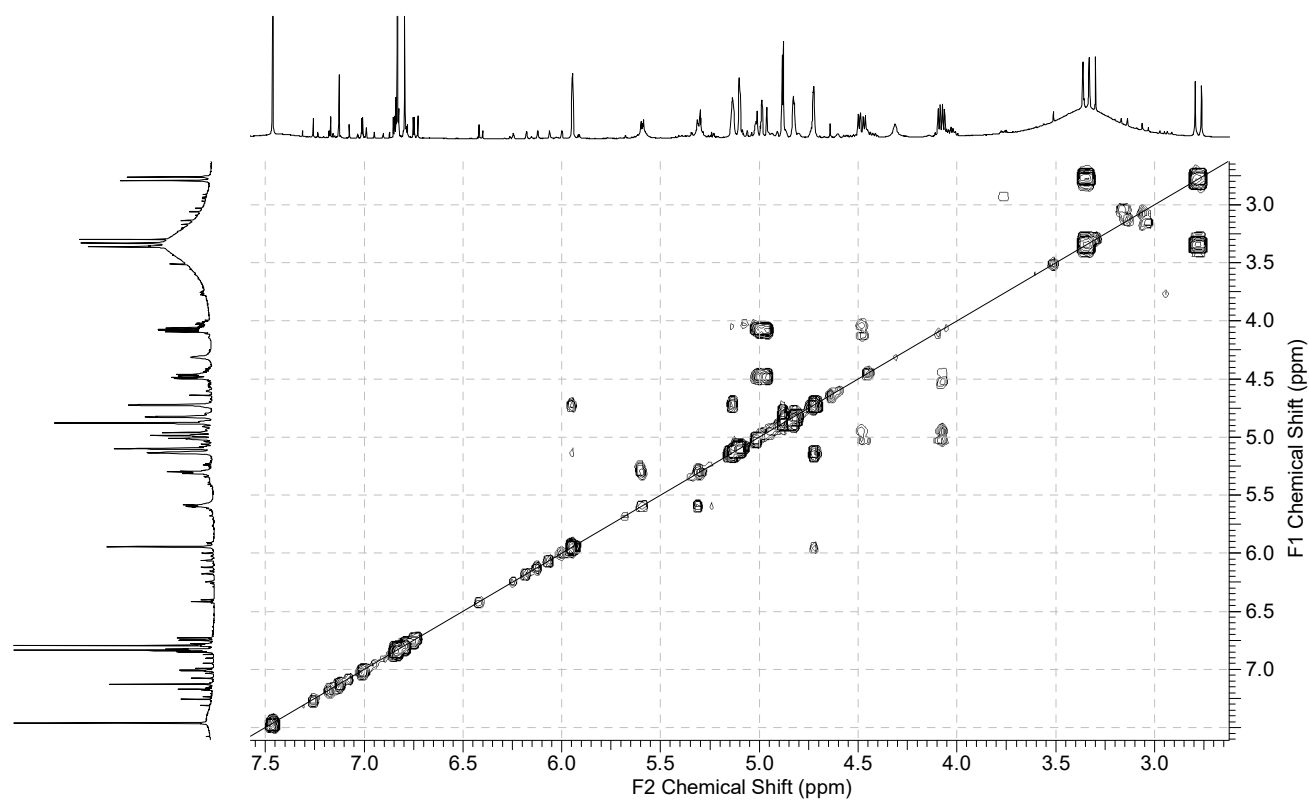



Figure S12. HSQC spectrum of **11**.

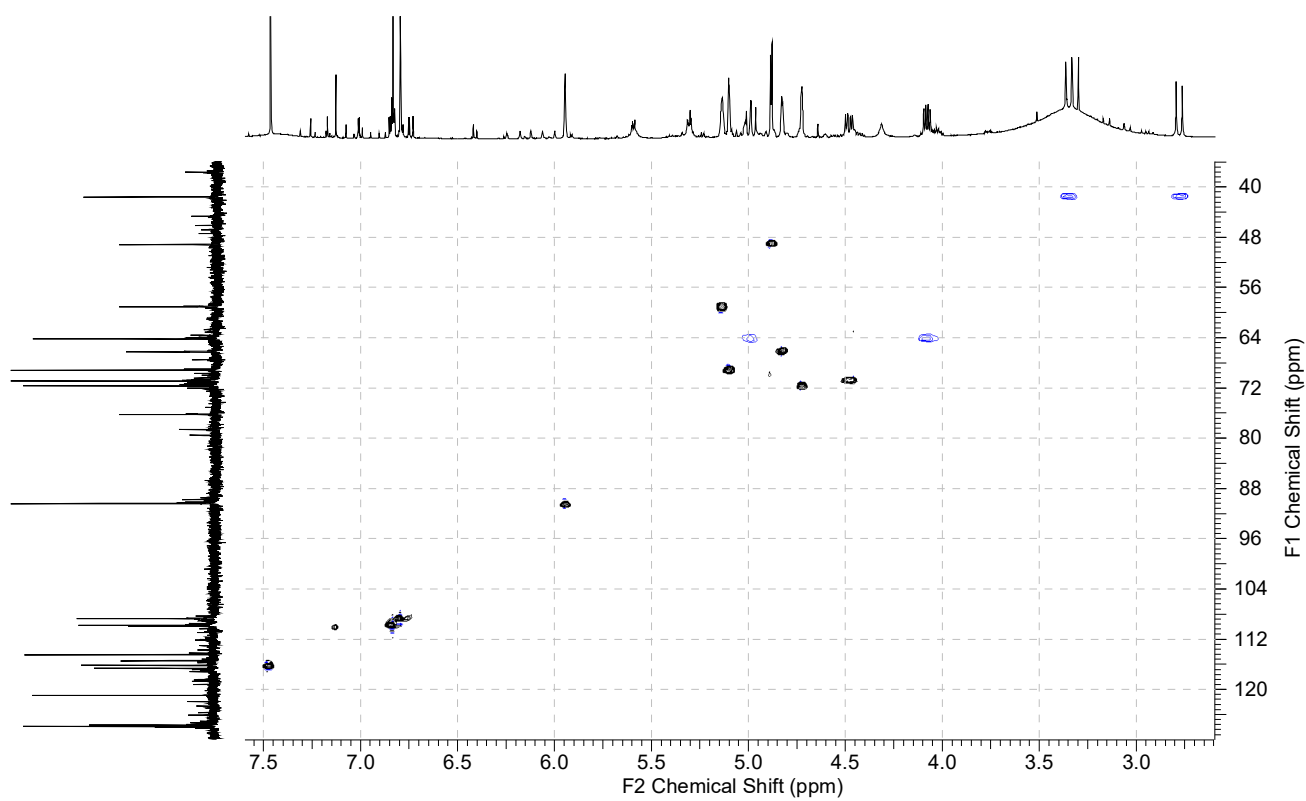

Figure S13. HMBC spectrum of **11**.

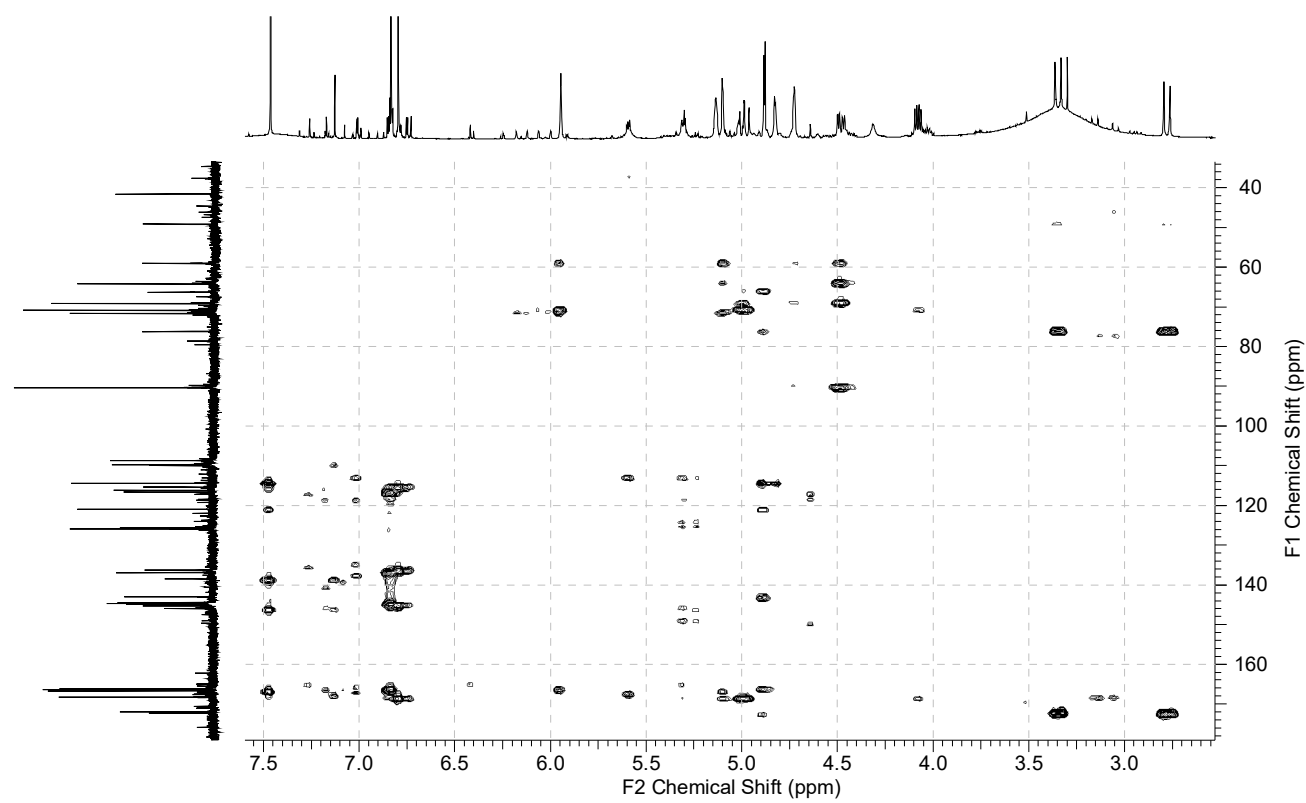

Figure S14. NOESY spectrum of **11**.

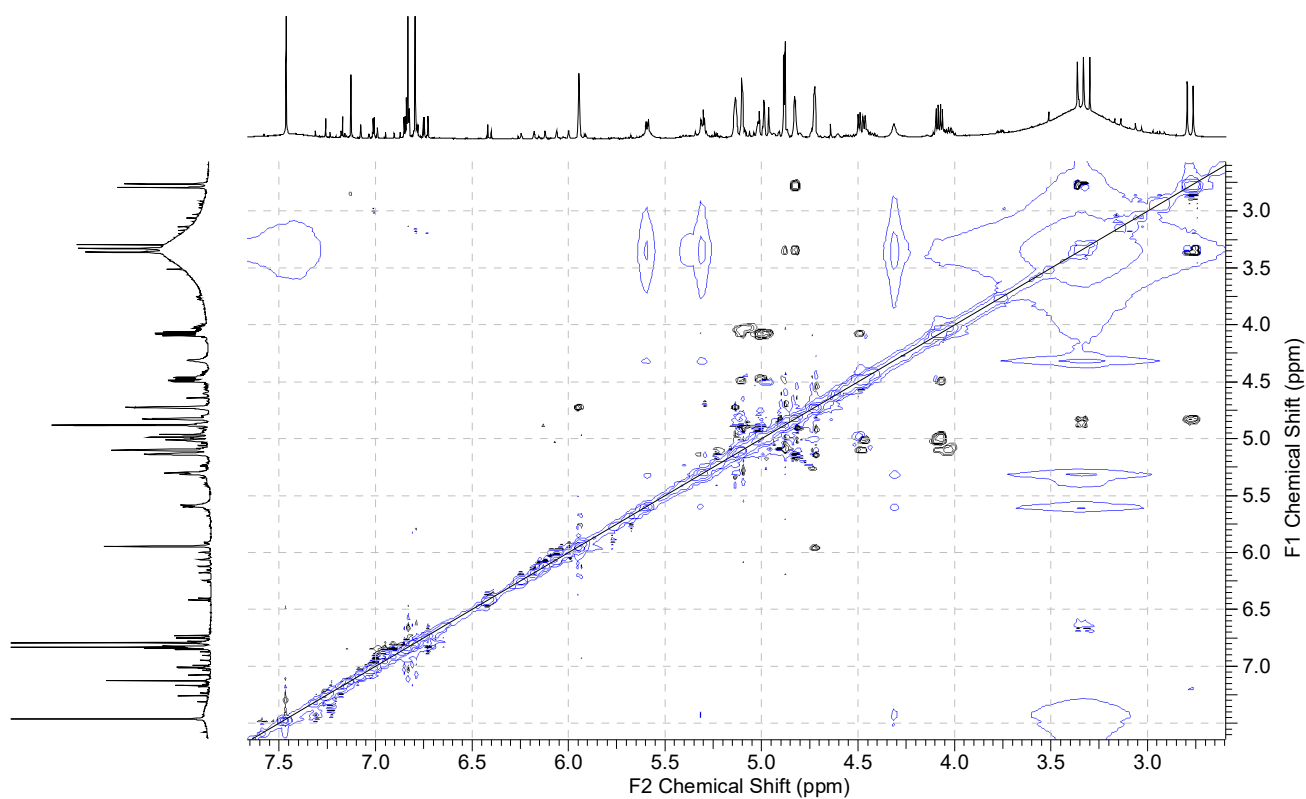

Figure S15. <sup>1</sup>H NMR spectrum of **7**.

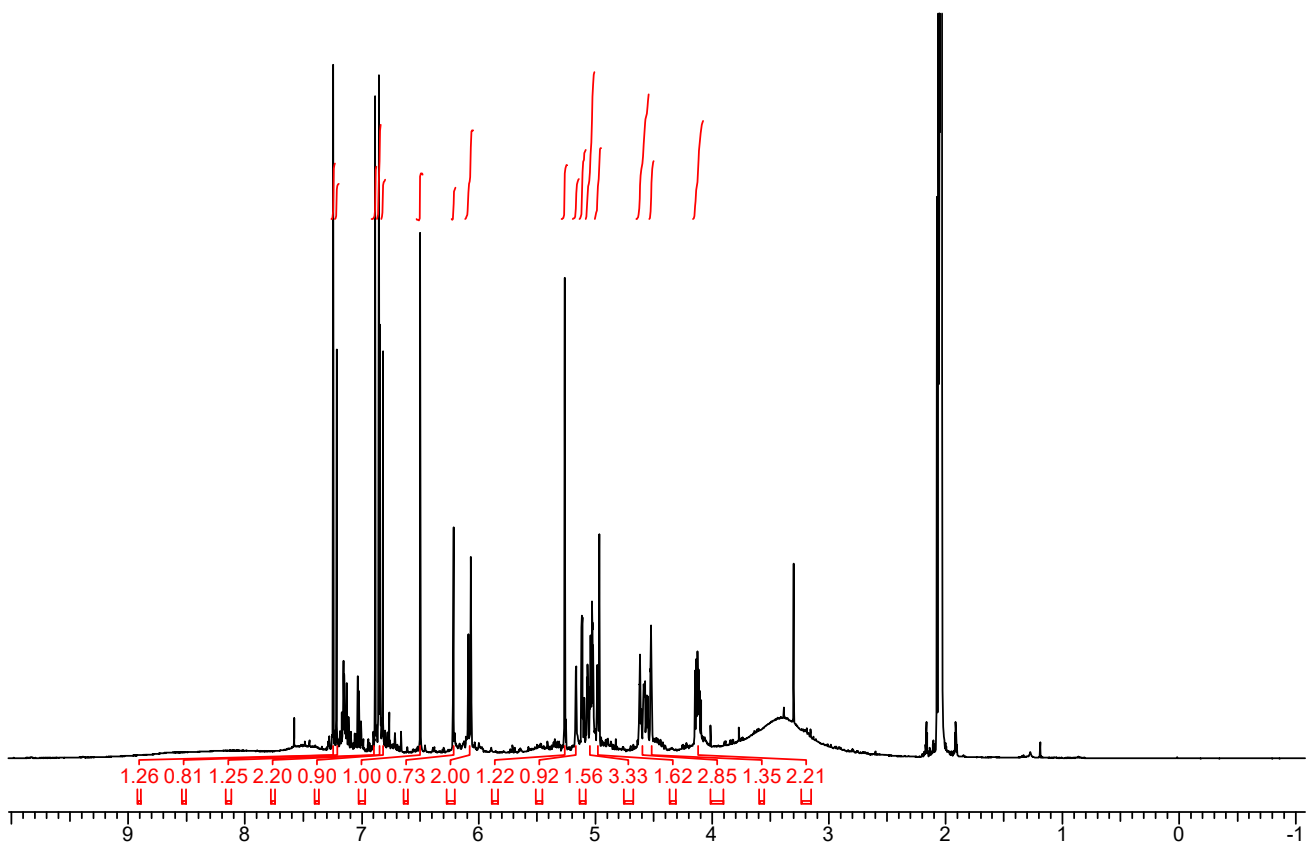

Figure S16.  $^{13}\text{C}$  NMR spectrum of 7.

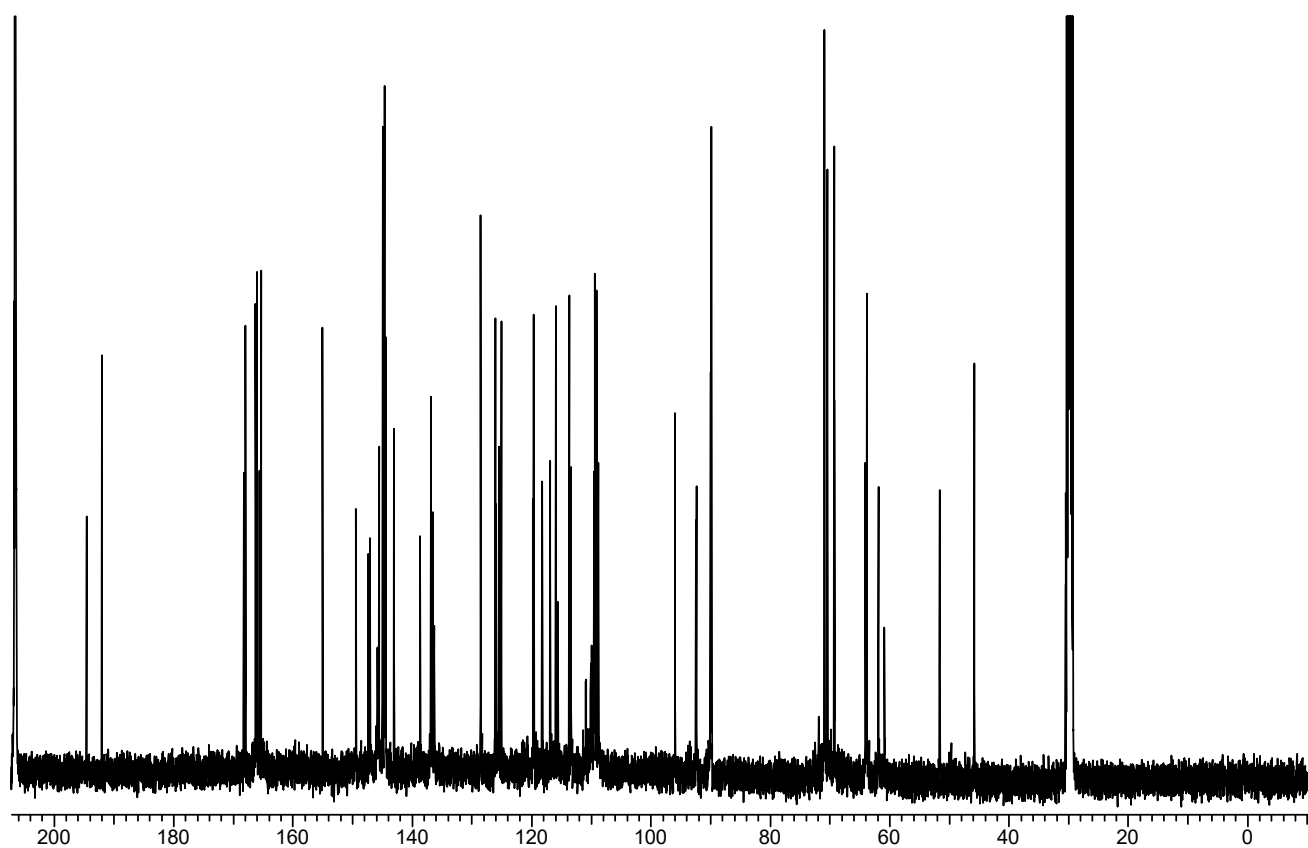

Figure S17.  $^1\text{H}$  NMR spectrum of 7a.

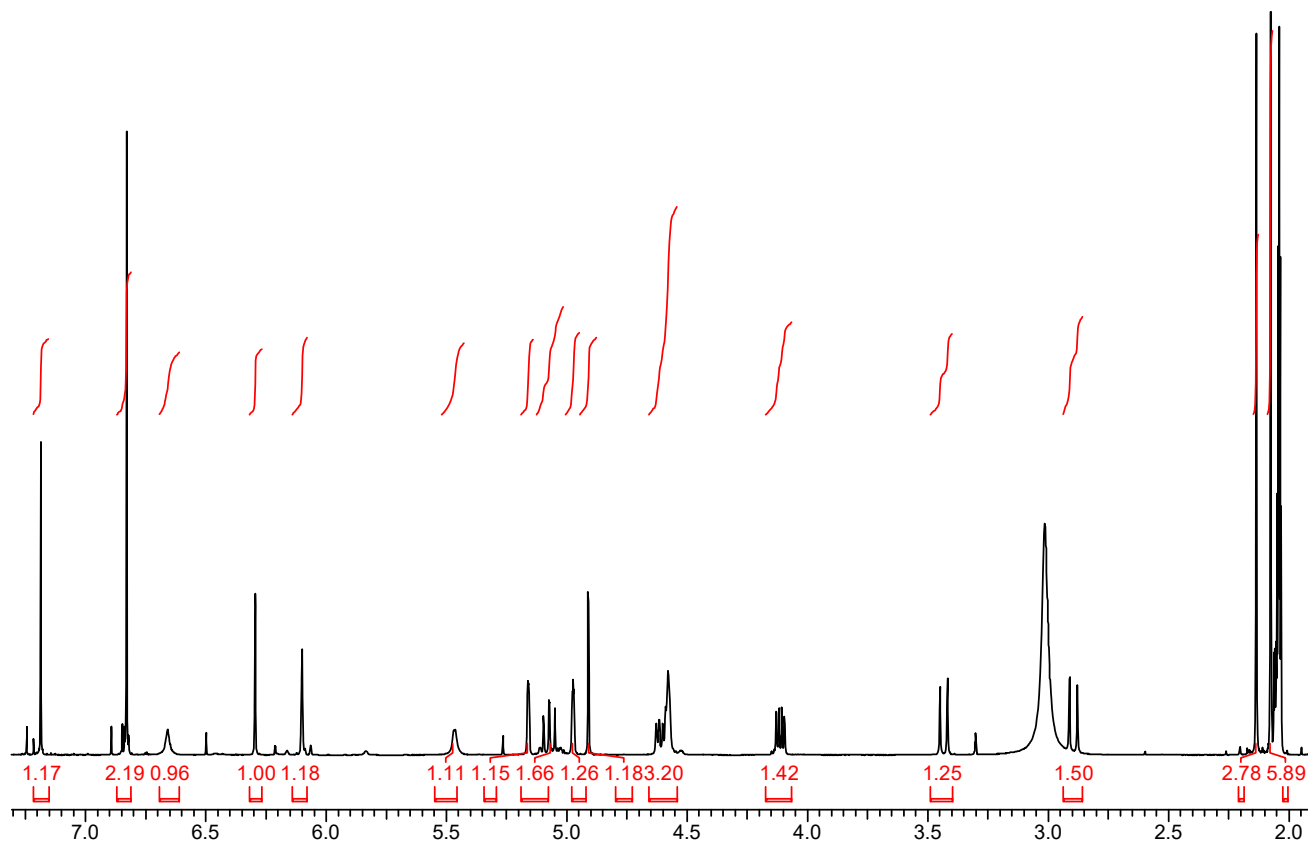

Figure S18.  $^{13}\text{C}$  NMR spectrum of **7a**.

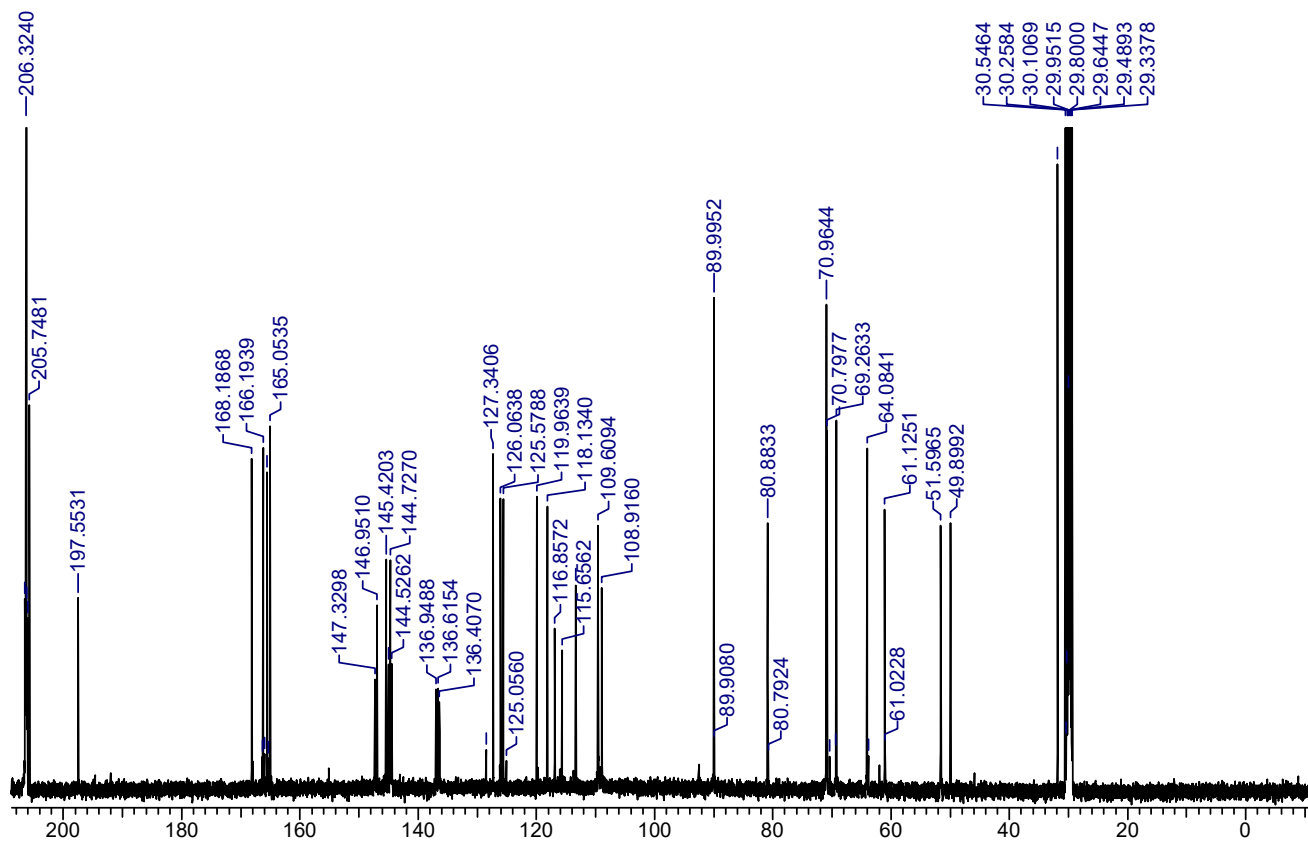

Supplement: molecules-26-00337-s001.pdf [file molecules-26-00337-s001.pdf]
